# Supplementary material for: Factors Influencing Preferences and Responses Towards Drug Safety Communications: A Conjoint Experiment Among Hospital-Based Healthcare Professionals in the Netherlands
Source: PubMed Central journal article supplement — Drug Saf. 2022 Sep 15;45(11):1369–80. doi: 10.1007/s40264-022-01230-y (PMC9560924; doi:10.1007/s40264-022-01230-y), 2022-09-15
Supplement: 40264_2022_1230_MOESM1_ESM.pdf [file 40264_2022_1230_MOESM1_ESM.pdf]

Factors influencing preferences and responses towards drug safety communications: a conjoint experiment among hospital-based healthcare professionals in the Netherlands

Esther de Vries, MSc<sup>1,2</sup>, Elisabeth Bakker, MSc<sup>1,2</sup>, Taco B.M. Monster, PharmD, PhD<sup>1,2</sup>, Prof. Petra Denig, PharmD<sup>1</sup>, Prof. Peter G.M. Mol, PharmD<sup>1,2</sup>

<sup>1</sup> University of Groningen, University Medical Center Groningen, Department Clinical Pharmacy and Pharmacology, Groningen, the Netherlands, <sup>2</sup> Dutch Medicines Evaluation Board, Utrecht, Netherlands

Corresponding author: [p.g.m.mol@umcg.nl](mailto:p.g.m.mol@umcg.nl)

**Supplementary table 1.** The survey (translated from Dutch)

| Question                                                                                                    | Answer categories                                                                                                                                                                                                                                                                                                                                                | Follow up question             |
|-------------------------------------------------------------------------------------------------------------|------------------------------------------------------------------------------------------------------------------------------------------------------------------------------------------------------------------------------------------------------------------------------------------------------------------------------------------------------------------|--------------------------------|
| 1. What is your profession within the hospital                                                              | <ul style="list-style-type: none"> <li>Hospital pharmacist</li> <li>Hospital pharmacist in training</li> <li>Medical specialist; namely_____</li> <li>Medical specialist in training; namely_____</li> <li>Nurse specialist/Physician assistant; namely_____</li> <li>Policlinic pharmacist</li> </ul>                                                           |                                |
| 2.Are you familiar with the DHPC                                                                            | <ul style="list-style-type: none"> <li>Yes</li> <li>Yes, heard of it but never seen one</li> <li>No</li> </ul>                                                                                                                                                                                                                                                   | If yes, 2b and 2c              |
| 2b.When you receive the DHPC, do you read it?                                                               | <ul style="list-style-type: none"> <li>Never</li> <li>Rarely</li> <li>Sometimes</li> <li>Often</li> <li>Always</li> </ul>                                                                                                                                                                                                                                        |                                |
| 2c.Do you find the DHPC as a form of risk communication useful?                                             | <ul style="list-style-type: none"> <li>Not useful at all</li> <li>Not useful</li> <li>Neutral</li> <li>Useful</li> <li>Very useful</li> </ul>                                                                                                                                                                                                                    |                                |
| 3.Through which channel would you like to receive the DHPC? (select all that apply)                         | <ul style="list-style-type: none"> <li>DHPC letter</li> <li>DHPC email</li> <li>Newsletter from professional association</li> <li>Integrated in the Pharmacotherapeutic Compass</li> <li>Integrated in the 'Kennisbank' (KNMP)</li> <li>Integrated in the CPOE</li> <li>In an app (for example the adverse event app of Lareb)</li> <li>No preference</li> </ul> | If multiple options chosen, 3b |
| 3b.Do you like the information through 1 or more channels chosen by you?                                    | <ul style="list-style-type: none"> <li>Through 1 of the channels chosen by me</li> <li>Through multiple of the channels chosen by me</li> <li>No preference</li> </ul>                                                                                                                                                                                           |                                |
| 4.Should safety issues, as described in the DHPC, be incorporated automatically in professional guidelines? | <ul style="list-style-type: none"> <li>Yes</li> <li>No</li> <li>I don't know/no opinion</li> </ul>                                                                                                                                                                                                                                                               |                                |
| <b>8 Hypothetical DHPCs</b>                                                                                 |                                                                                                                                                                                                                                                                                                                                                                  |                                |
| 5.How important is it to                                                                                    | Likert scale 0-100                                                                                                                                                                                                                                                                                                                                               |                                |

|                                                                                              |                                                                                                                                                                                                                                                                                                                                                                                                                                                                                                                                                                                     |                           |
|----------------------------------------------------------------------------------------------|-------------------------------------------------------------------------------------------------------------------------------------------------------------------------------------------------------------------------------------------------------------------------------------------------------------------------------------------------------------------------------------------------------------------------------------------------------------------------------------------------------------------------------------------------------------------------------------|---------------------------|
| you to be informed about this drug safety issue?                                             |                                                                                                                                                                                                                                                                                                                                                                                                                                                                                                                                                                                     |                           |
| 6.What would you do in response to the DHPC? (select all that apply)                         | <ul style="list-style-type: none"> <li>• Discontinue treatment of existing users</li> <li>• Reconsider the drug for existing users</li> <li>• Stop prescribing the drug for new patients</li> <li>• Reconsider the drug for new patients</li> <li>• Additional testing users</li> <li>• Discuss the safety issue with colleagues</li> <li>• Nothing</li> <li>• Other; namely____</li> </ul>                                                                                                                                                                                         |                           |
| 7.Which moment would you like to receive the information? (select all that apply)            | <ul style="list-style-type: none"> <li>• Immediate (for example in through the DHPC)</li> <li>• Periodically (for example through a newsletter of professional association)</li> <li>• When I look for drug information (for example integrated in the Pharmacotherapeutic Compass, 'Kennisbank')</li> <li>• The moment of prescribing (for example integrated in the CPOE)</li> <li>• Does not matter</li> </ul>                                                                                                                                                                   |                           |
| <b>Question</b>                                                                              | <b>Answer categories</b>                                                                                                                                                                                                                                                                                                                                                                                                                                                                                                                                                            | <b>Follow up question</b> |
| How long have you been working as a healthcare provider in a hospital                        | <ul style="list-style-type: none"> <li>• &lt; 5 years</li> <li>• 5-10 years</li> <li>• &gt;10 years</li> </ul>                                                                                                                                                                                                                                                                                                                                                                                                                                                                      |                           |
| In what type of hospital do you work?                                                        | <ul style="list-style-type: none"> <li>• Academic</li> <li>• Top clinical</li> <li>• General</li> </ul>                                                                                                                                                                                                                                                                                                                                                                                                                                                                             |                           |
| What is your age?                                                                            | <ul style="list-style-type: none"> <li>• &lt;35 years</li> <li>• 35-45 years</li> <li>• 46-55 years</li> <li>• &gt;55 years</li> </ul>                                                                                                                                                                                                                                                                                                                                                                                                                                              |                           |
| Where do you get general drug information, which sources do you use? (select all that apply) | <ul style="list-style-type: none"> <li>• Pharmacotherapeutic Compass</li> <li>• 'Kennisbank' (KNMP)</li> <li>• Medical magazines/journals</li> <li>• Clinical trials</li> <li>• Conferences</li> <li>• Summary of Product Characteristics (SmPC/previous IB text)</li> <li>• National guidelines</li> <li>• Direct Healthcare Professional Communication (DHPC)</li> <li>• Newsletters (e.g., MEB, Lareb)</li> <li>• Health Base</li> <li>• Colleagues</li> <li>• Lay media (tv programmes, newspapers, social media like Facebook/Twitter)</li> <li>• Other; namely____</li> </ul> |                           |

CPOE: computerized physician order entry, DHPC: Direct Healthcare Professional Communications, KNMP: Royal Dutch Pharmacists Association (Koninklijke Nederlandse Maatschappij ter bevordering der Pharmacie), Lareb: the Netherlands Pharmacovigilance Centre Lareb, MEB: Dutch Medicines Evaluation Board.

Factors influencing preferences and responses towards drug safety communications: a conjoint experiment among hospital-based healthcare professionals in the Netherlands

Esther de Vries, MSc<sup>1,2</sup>, Elisabeth Bakker, MSc<sup>1,2</sup>, Taco B.M. Monster, PharmD, PhD<sup>1,2</sup>, Prof. Petra Denig, PharmD<sup>1</sup>, Prof. Peter G.M. Mol, PharmD<sup>1,2</sup>

<sup>1</sup> University of Groningen, University Medical Center Groningen, Department Clinical Pharmacy and Pharmacology, Groningen, the Netherlands, <sup>2</sup> Dutch Medicines Evaluation Board, Utrecht, Netherlands

Corresponding author: [p.g.m.mol@umcg.nl](mailto:p.g.m.mol@umcg.nl)

**Supplementary figure 1.** Example of a hypothetical Direct Healthcare Professional Communication.

**Clinical studies** have revealed a new risk for drug Z that is used for a chronic, slowly progressive condition within your patient population/specialty for which multiple drugs are available.

This risk occurs **very rarely (<1/10,000)**. The risk can lead to **irreversible disability** and is **potentially life-threatening**. Users should receive **additional monitoring** (for example, additional lab tests).

It is a product for which there is **more than 10 years** of experience.

Factors influencing preferences and responses towards drug safety communications: a conjoint experiment among hospital-based healthcare professionals in the Netherlands

Esther de Vries, MSc<sup>1,2</sup>, Elisabeth Bakker, MSc<sup>1,2</sup>, Taco B.M. Monster, PharmD, PhD<sup>1,2</sup>, Prof. Petra Denig, PharmD<sup>1</sup>, Prof. Peter G.M. Mol, PharmD<sup>1,2</sup>

<sup>1</sup> University of Groningen, University Medical Center Groningen, Department Clinical Pharmacy and Pharmacology, Groningen, the Netherlands, <sup>2</sup> Dutch Medicines Evaluation Board, Utrecht, Netherlands

Corresponding author: [p.g.m.mol@umcg.nl](mailto:p.g.m.mol@umcg.nl)

**Supplementary table 2.** Importance of the information – all HCPs

| Determinant                     | Level                                           | 0        | 10        | 20        | 30        | 40        | 50         | 60         | 70          | 80          | 90         | 100         |
|---------------------------------|-------------------------------------------------|----------|-----------|-----------|-----------|-----------|------------|------------|-------------|-------------|------------|-------------|
| Frequency of the safety issue   | Very rare                                       | 6 (1.1%) | 18 (3.4%) | 16 (3.0%) | 26 (4.9%) | 20 (3.8%) | 51 (9.7%)  | 72 (13.7%) | 94 (17.9%)  | 114 (21.7%) | 57 (10.8%) | 52 (9.9%)   |
|                                 | Rare                                            | 1 (0.4%) | 3 (1.2%)  | 7 (2.7%)  | 9 (3.5%)  | 5 (1.9%)  | 22 (8.5%)  | 21 (8.1%)  | 56 (21.5%)  | 59 (22.7%)  | 43 (16.5%) | 34 (13.1%)  |
|                                 | Uncommon                                        | 1 (0.4%) | 1 (0.4%)  | 2 (0.7%)  | 9 (3.4%)  | 4 (1.5%)  | 16 (6.0%)  | 26 (9.7%)  | 36 (13.5%)  | 52 (19.5%)  | 54 (20.2%) | 66 (24.7%)  |
| Seriousness of the safety issue | Hospitalisation                                 | 9 (1.7%) | 14 (2.7%) | 18 (3.4%) | 31 (5.9%) | 20 (3.8%) | 57 (10.8%) | 75 (14.2%) | 99 (18.8%)  | 110 (20.8%) | 58 (11.0%) | 38 (7.2%)   |
|                                 | Life threatening and irreversible               | 0 (0.0%) | 8 (1.5%)  | 7 (1.3%)  | 13 (2.5%) | 9 (1.7%)  | 32 (6.1%)  | 44 (8.3%)  | 87 (16.6%)  | 115 (21.9%) | 96 (18.3%) | 114 (21.7%) |
| Need to take action             | Be alert                                        | 4 (0.8%) | 9 (1.7%)  | 16 (3.0%) | 23 (4.4%) | 18 (3.4%) | 53 (10.1%) | 73 (13.9%) | 96 (18.2%)  | 114 (21.6%) | 61 (11.6%) | 60 (11.4%)  |
|                                 | Additional monitoring                           | 4 (0.8%) | 13 (2.5%) | 9 (1.7%)  | 21 (4.0%) | 11 (2.1%) | 36 (6.8%)  | 46 (8.7%)  | 90 (17.1%)  | 111 (21.1%) | 93 (17.7%) | 92 (17.5%)  |
| Life span of the drug           | <10 years                                       | 6 (1.1%) | 10 (1.9%) | 13 (2.5%) | 19 (3.6%) | 13 (2.5%) | 45 (8.5%)  | 54 (10.2%) | 95 (18.0%)  | 99 (18.7%)  | 89 (16.8%) | 86 (16.3%)  |
|                                 | >10 years                                       | 2 (0.4%) | 12 (2.3%) | 12 (2.3%) | 25 (4.8%) | 16 (3.1%) | 44 (8.4%)  | 65 (12.4%) | 91 (17.4%)  | 126 (24.0%) | 65 (12.4%) | 66 (12.6%)  |
| Type of evidence                | Epidemiological studies and spontaneous reports | 3 (0.6%) | 11 (2.1%) | 9 (1.7%)  | 22 (4.2%) | 11 (2.1%) | 51 (9.7%)  | 67 (12.8%) | 79 (15.1%)  | 121 (23.1%) | 75 (14.3%) | 75 (14.3%)  |
|                                 | Clinical research                               | 5 (0.9%) | 11 (2.1%) | 16 (3.0%) | 22 (4.2%) | 18 (3.4%) | 38 (7.2%)  | 52 (9.8%)  | 107 (20.2%) | 104 (19.7%) | 79 (14.9%) | 77 (14.6%)  |

# Factors influencing preferences and responses towards drug safety communications: a conjoint experiment among hospital-based healthcare professionals in the Netherlands

Esther de Vries, MSc<sup>1,2</sup>, Elisabeth Bakker, MSc<sup>1,2</sup>, Taco B.M. Monster, PharmD, PhD<sup>1,2</sup>, Prof. Petra Denig, PharmD<sup>1</sup>, Prof. Peter G.M. Mol, PharmD<sup>1,2</sup>

<sup>1</sup> University of Groningen, University Medical Center Groningen, Department Clinical Pharmacy and Pharmacology, Groningen, the Netherlands, <sup>2</sup> Dutch Medicines Evaluation Board, Utrecht, Netherlands

Corresponding author: [p.g.m.mol@umcg.nl](mailto:p.g.m.mol@umcg.nl)

**Supplementary table 3.** Preferred moment of communication – All HCPs

| Determinant                        | Level                                              | Immediate<br>(e.g. through a<br>DHPC) | Periodically<br>(e.g. through a<br>newsletter of<br>professional<br>association) | When I look for drug<br>information<br>(e.g. integrated in the<br>Pharmacotherapeutic<br>Compass or<br>'Kennisbank') | At the moment of<br>prescribing<br>(e.g. integrated in<br>the CPOE) |
|------------------------------------|----------------------------------------------------|---------------------------------------|----------------------------------------------------------------------------------|----------------------------------------------------------------------------------------------------------------------|---------------------------------------------------------------------|
| Frequency of the<br>safety issue   | Very rare                                          | 186 (35.1%)                           | 249 (47.0%)                                                                      | 257 (48.5%)                                                                                                          | 236 (44.5%)                                                         |
|                                    | Rare                                               | 118 (45.0%)                           | 113 (43.1%)                                                                      | 132 (50.4%)                                                                                                          | 130 (49.6%)                                                         |
|                                    | Uncommon                                           | 149 (55.6%)                           | 103 (38.4%)                                                                      | 133 (49.6%)                                                                                                          | 147 (54.9%)                                                         |
| Seriousness of the<br>safety issue | Hospitalisation                                    | 150 (28.1%)                           | 261 (48.9%)                                                                      | 260 (48.7%)                                                                                                          | 248 (46.4%)                                                         |
|                                    | Life threatening and irreversible                  | 303 (57.6%)                           | 204 (38.8%)                                                                      | 262 (49.8%)                                                                                                          | 265 (50.4%)                                                         |
| Need to take action                | Be alert                                           | 199 (37.5%)                           | 254 (47.9%)                                                                      | 255 (48.1%)                                                                                                          | 234 (44.2%)                                                         |
|                                    | Additional monitoring                              | 254 (47.9%)                           | 211 (39.8%)                                                                      | 267 (50.4%)                                                                                                          | 279 (52.6%)                                                         |
| Life span of the drug              | <10 years                                          | 235 (44.0%)                           | 231 (43.3%)                                                                      | 265 (49.6%)                                                                                                          | 267 (50.0%)                                                         |
|                                    | >10 years                                          | 218 (41.4%)                           | 234 (44.5%)                                                                      | 257 (48.9%)                                                                                                          | 246 (46.8%)                                                         |
| Type of evidence                   | Epidemiological studies and<br>spontaneous reports | 227 (42.8%)                           | 232 (43.8%)                                                                      | 264 (49.8%)                                                                                                          | 260 (49.1%)                                                         |
|                                    | Clinical research                                  | 226 (42.6%)                           | 233 (44.0%)                                                                      | 258 (48.7%)                                                                                                          | 253 (47.7%)                                                         |

CPOE: computerized physician order entry, DHPC: Direct Healthcare Professional Communications

Factors influencing preferences and responses towards drug safety communications: a conjoint experiment among hospital-based healthcare professionals in the Netherlands

Esther de Vries, MSc<sup>1,2</sup>, Elisabeth Bakker, MSc<sup>1,2</sup>, Taco B.M. Monster, PharmD, PhD<sup>1,2</sup>, Prof. Petra Denig, PharmD<sup>1</sup>, Prof. Peter G.M. Mol, PharmD<sup>1,2</sup>

<sup>1</sup> University of Groningen, University Medical Center Groningen, Department Clinical Pharmacy and Pharmacology, Groningen, the Netherlands, <sup>2</sup> Dutch Medicines Evaluation Board, Utrecht, Netherlands

Corresponding author: [p.g.m.mol@umcg.nl](mailto:p.g.m.mol@umcg.nl)

**Supplementary table 4.** Intended actions – all HCPs

| Determinant                           | Level                                              | <b>Discontinue</b><br>existing<br>users | <b>Reconsider</b><br>existing<br>users | <b>Stop</b><br>prescribing<br>new patients | <b>Reconsider</b><br>new patients | <b>Additional</b><br><b>testing</b><br>for users | <b>Discuss</b> issue<br>with<br>colleagues |
|---------------------------------------|----------------------------------------------------|-----------------------------------------|----------------------------------------|--------------------------------------------|-----------------------------------|--------------------------------------------------|--------------------------------------------|
| Frequency of<br>the safety<br>issue   | Very rare                                          | 18 (3.4%)                               | 205 (38.3%)                            | 52 (9.7%)                                  | 222 (41.5%)                       | 191 (35.7%)                                      | 281 (52.5%)                                |
|                                       | Rare                                               | 10 (3.8%)                               | 111 (42.2%)                            | 33 (12.5%)                                 | 110 (41.8%)                       | 109 (41.4%)                                      | 143 (54.4%)                                |
|                                       | Uncommon                                           | 31 (11.6%)                              | 139 (51.9%)                            | 67 (25.0%)                                 | 123 (45.9%)                       | 102 (38.1%)                                      | 172 (64.2%)                                |
| Seriousness of<br>the safety<br>issue | Hospitalisation                                    | 5 (0.9%)                                | 178 (33.3%)                            | 35 (6.5%)                                  | 214 (40.0%)                       | 201 (37.6%)                                      | 276 (51.6%)                                |
|                                       | Life threatening and<br>irreversible               | 54 (10.2%)                              | 277 (52.2%)                            | 117 (22.0%)                                | 241 (45.4%)                       | 201 (37.9%)                                      | 320 (60.3%)                                |
| Need to take<br>action                | Be alert                                           | 19 (3.6%)                               | 227 (42.4%)                            | 60 (11.2%)                                 | 240 (44.9%)                       | 89 (16.6%)                                       | 304 (56.8%)                                |
|                                       | Additional monitoring                              | 40 (7.5%)                               | 228 (42.9%)                            | 92 (17.3%)                                 | 215 (40.5%)                       | 313 (58.9%)                                      | 292 (55.0%)                                |
| Life span of<br>the drug              | <10 years                                          | 40 (7.5%)                               | 224 (41.9%)                            | 93 (17.4%)                                 | 217 (40.6%)                       | 194 (36.3%)                                      | 293 (54.9%)                                |
|                                       | >10 years                                          | 19 (3.6%)                               | 231 (43.4%)                            | 59 (11.1%)                                 | 238 (44.7%)                       | 208 (39.1%)                                      | 303 (57.0%)                                |
| Type of<br>evidence                   | Epidemiological studies and<br>spontaneous reports | 31 (5.8%)                               | 227 (42.8%)                            | 73 (13.8%)                                 | 235 (44.3%)                       | 209 (39.4%)                                      | 299 (56.4%)                                |
|                                       | Clinical research                                  | 28 (5.2%)                               | 228 (42.5%)                            | 79 (14.7%)                                 | 220 (41.0%)                       | 193 (36.0%)                                      | 297 (55.4%)                                |
